- 5 Gabilondo F, Rodriguez F, Mohar A, Nuovo GJ, Dominguez-Malagon H: Primary synovial sarcoma of the kidney: corroboration with in situ polymerase chain reaction. *Ann Diagn Pathol* 2008;12:134–137.
- 6 Wang ZH, Wang XC, Xue M: Clinicopathologic analysis of 4 cases of primary renal synovial sarcoma. *Chin J Cancer* 2010;29:212–216.
- 7 Jun SY, Choi J, Kang GH, Park SH, Ayala AG, Ro JY: Synovial sarcoma of the kidney with rhabdoid features: report of three cases. *Am J Surg Pathol* 2004;28:634–637.
- 8 Zakhary MM, Elsayes KM, Platt JF, Francis IR: Magnetic resonance imaging features of renal synovial sarcoma: a case report. *Cancer Imaging* 2008;8:45–47.
- 9 Dassi V, Das K, Singh BP, Swain SK: Primary synovial sarcoma of kidney: a rare tumor with an atypical presentation. *Indian J Urol* 2009;25:269–271.
- 10 Kawahara T, Sekiguchi Z, Makiyama K, Nakayama T, Nagashima Y, Kita K, et al: Primary synovial sarcoma of the kidney. *Case Rep Oncol* 2009;2:189–193.
- 11 Perlmutter A, Saunders S, Zaslau S, Chang WWL, Farivar-Mohseni H: Primary synovial sarcoma of the kidney. *Int J Urol* 2005;12:760–762.
- 12 Koyama S, Morimitsu Y, Morokuma F, Hashimoto H: Primary synovial sarcoma of the kidney: report of a case confirmed by molecular detection of the SYT-SSX2 fusion transcripts. *Pathol Int* 2001;51:385–391.
- 13 Scarpato KR, Makari JH, Agaronov M, Balarezo F, Parikh N, Finck CM, et al: Primary renal synovial sarcoma in a 13 year-old-boy. *J Pediatr Surg* 2011;46:1849–1851.
- 14 Nishida T, Inamoto T, Uehara H, Ibuki N, Koyama K, Komura K, et al: Monophasic primary renal synovial sarcoma accompanied with a hemorrhagic cyst. *Urol J* 2011;8:244–247.

## Corrigendum

Please be informed that the author Ivan Soldatović wishes to be excluded from the list of authors of the following paper published in this journal:

Dragičević S, et al: Evaluation of health-related quality of life in patients with prostate cancer after treatment with radical retropubic prostatectomy and permanent prostate brachytherapy. *Urol Int* 2010;85:173–179.
